# Supplementary material for: Towards survival prediction of cancer patients using medical images
Source: PeerJ journal article supplement (doi:10.7717/peerj-cs.1090), 2022-10-26
Supplement: Supplemental__Table_S1.pdf [file Supplemental__Table_S1.pdf]

| SR# | Model      | Parameters Used                                                                                                                                                                                                                                                                                                                                                                        |
|-----|------------|----------------------------------------------------------------------------------------------------------------------------------------------------------------------------------------------------------------------------------------------------------------------------------------------------------------------------------------------------------------------------------------|
| 1   | LoR        | Penalty: l2, dual=false, tolerance= 1e-4, C=1.0, fit_intercept=1, intercept_scaling=1                                                                                                                                                                                                                                                                                                  |
| 2   | LRx        | fit_intercept=True, normalize=false, copy_X=true, n_jobs=None, positive=false                                                                                                                                                                                                                                                                                                          |
| 3   | RFC        | n_estimators=100, criterion=gini, max_depth=None, min_samples_split=2, min_samples_leaf=1, min_weight_fraction_leaf=1, max_features=sqrt, bootstrap=True, max_leaf_nodes=None, min_impurity_decrease=0, oob_score=False, n_jobs=None, random_state=None, verbose=0, warm_start=False, class_weight=None, ccp_alpha=0, max_samples=None                                                 |
| 4   | RFR        | n_estimators=100, criterion=squared error, max_depth=None, min_samples_split=2, min_samples_leaf=1, min_weight_fraction_leaf=0, max_leaf_nodes=None, min_impurity_decrease=0, bootstrap=True, oob_score=False, n_jobs=None, random_state=None, verbose=0, ccp_alpha=0, max_samples=None                                                                                                |
| 5   | DTC        | criterion=gini, splitter=best, max_depth=None, min_samples_split=2, min_samples_leaf=1, min_weight_fraction_leaf=0, max_features=None, max_leaf_nodes=None, min_impurity_decrease=0, ccp_alpha=0, class_weight= None                                                                                                                                                                   |
| 6   | DTR        | criterion=squared error, splitter=best, max_depth=None, min_samples_split=2, min_samples_leaf=1, min_weight_fraction_leaf=0, max_features=None, max_leaf_nodes=None, min_impurity_decrease=0, ccp_alpha=0, max_features= None                                                                                                                                                          |
| 7   | MLPC, MLPR | hidden layer sizes=100, activation='relu', solver=adam, alpha=0.0001, batch size=auto, learning rate=constant, learning rate init=0.001, power t=0.5, max iter=200, shuffle= True, random state=None, tol=1e-4, verbose=False, warm state=False, momentum=0.9, early stopping=False, validation fraction=0.1, beta 1=0.9, beta 2=0.999, epsilom=1e-8,max fun=15000,n iter no change=10 |
| 8   | SVM        | C=1.0, kernel=rbf, degree=3, gamma=scale, coef0=0, shrinking=True, probability=False, tol=1e-3, cache size=200, class_weight=None, verbose=False, max iter=-1, break ties=False, random state=None. decision function shape=ovr                                                                                                                                                        |
